# Supplementary material for: Missing WD40 Repeats in ATG16L1 Delays Canonical Autophagy and Inhibits Noncanonical Autophagy
Source: MDPI journal article supplement (doi:10.3390/ijms25084493), 2024-04-19
Supplement: s1 [file s1]

## Supplemental data

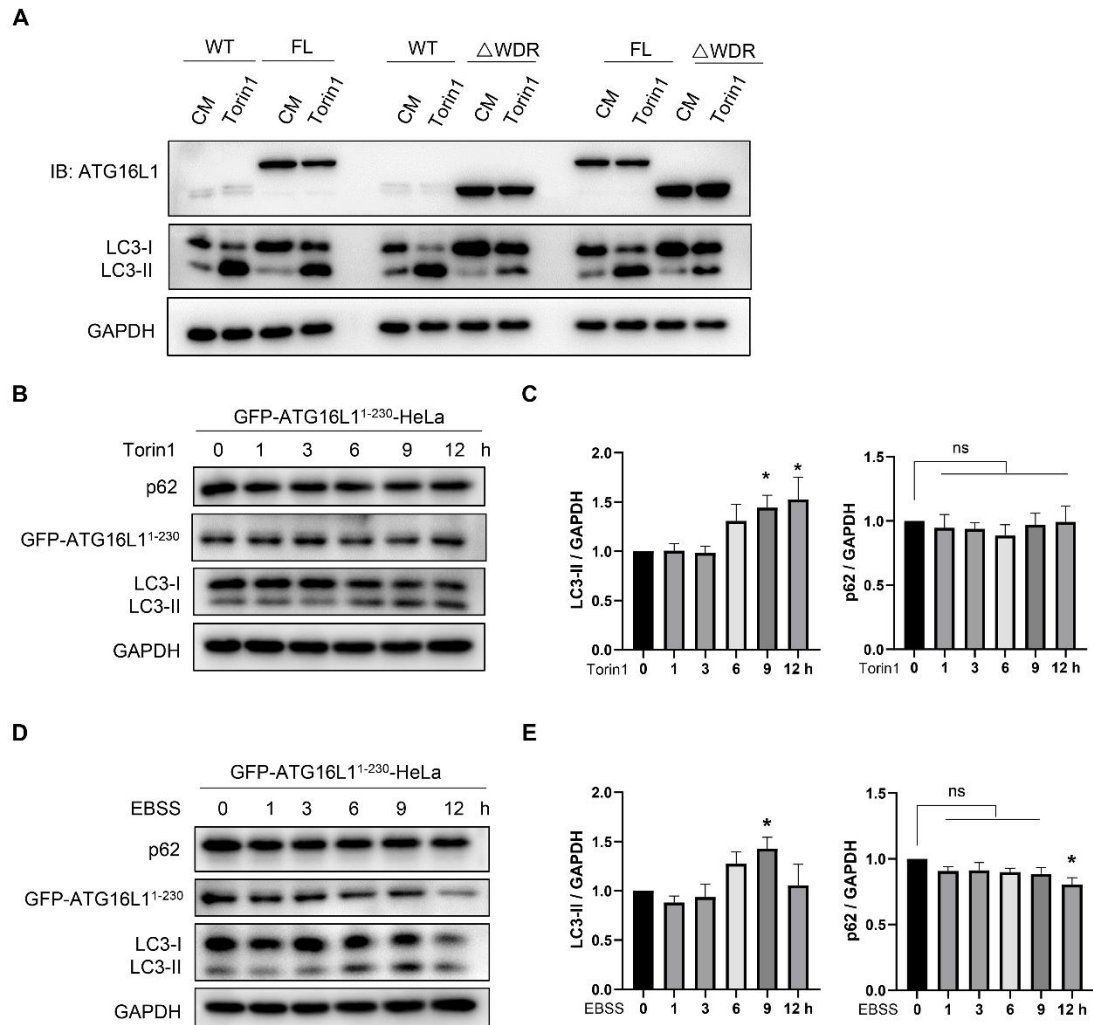

**Figure S1. Canonical autophagy in ATG16L1<sup>ΔWDR</sup> cells is blocked.**

(A) WT-HeLa cells and *ATG16L1*<sup>-/-</sup>-HeLa cells stably expressing GFP-ATG16L1 (FL) GFP-ATG16L1<sup>ΔWDR</sup> ( $\Delta$ WDR) were treated with 1  $\mu$ M of torin1 for 12 h. ATG16L1, LC3, and GAPDH were analyzed by immunoblotting.

(B-C) ATG16L1<sup>-/-</sup>-HeLa cells stably expressing GFP-ATG16L1<sup>1-230</sup> were treated with 1  $\mu$ M of torin1 for 0, 1, 3, 6, 9, 12 h (B). GFP-ATG16L1<sup>1-230</sup>, p62, LC3, and GAPDH were analyzed by immunoblotting (C). n=3. \**P*<0.05

(D-E) ATG16L1<sup>-/-</sup>-HeLa cells stably expressing GFP-ATG16L1<sup>1-230</sup> were treated with EBSS for 0, 1, 3, 6, 9, 12 h (D). GFP-ATG16L1<sup>1-230</sup>, p62, LC3, and GAPDH were analyzed by immunoblotting (E). n=3. \**P*<0.05

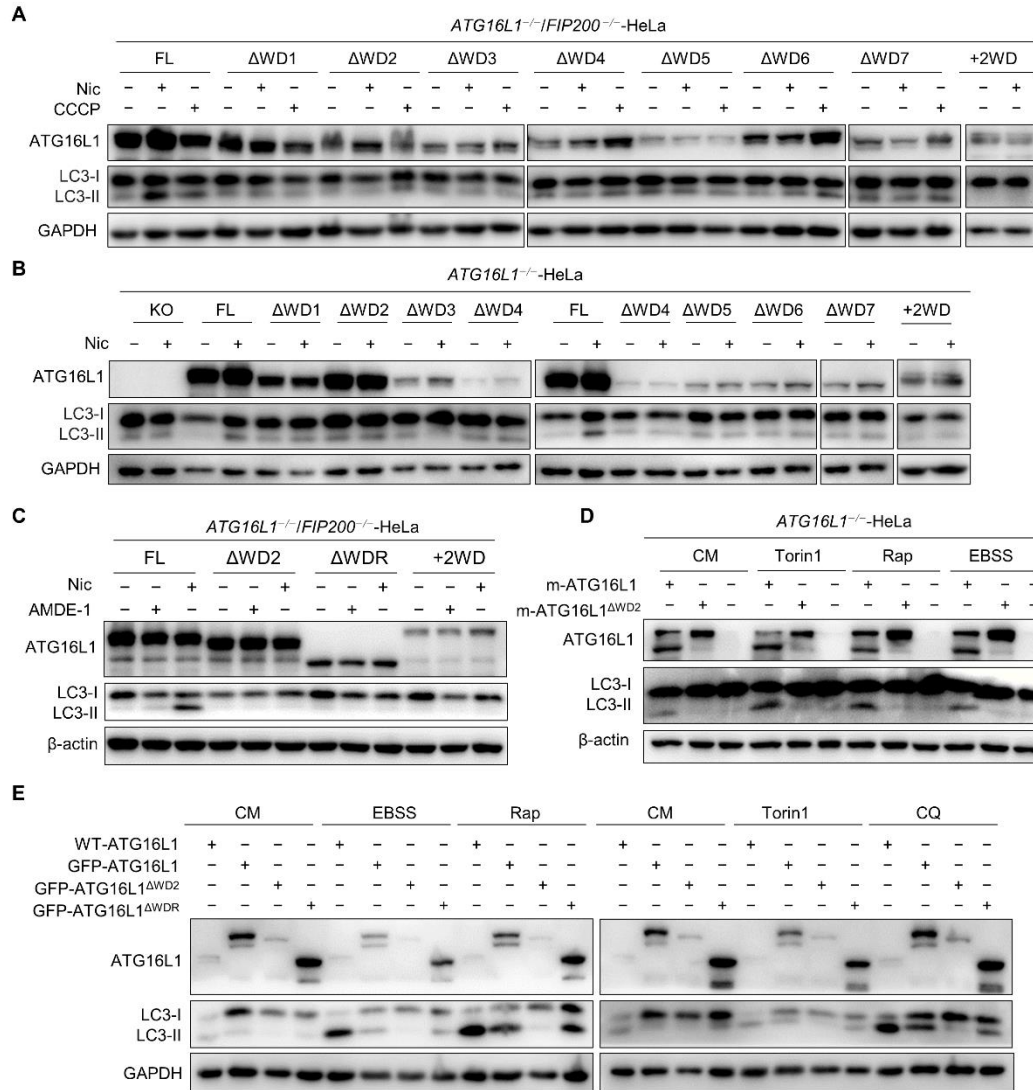

**Figure S2. ATG16L1 with incomplete WDR could not mediate NCA induced by compounds.**

(A-B) Immunoblot of ATG16L1, LC3, GAPDH in *ATG16L1<sup>-/-</sup>/FIP200<sup>-/-</sup>-HeLa* (A) and *ATG16L1<sup>-/-</sup>-HeLa* (B) cells transiently transfected with ATG16L1 mutants for 42 h and then treated with 10  $\mu$ M of niclosamide (Nic) or 30  $\mu$ M of CCCP for 6 h.

(C) Immunoblot of ATG16L1 and LC3 in *ATG16L1<sup>-/-</sup>/FIP200<sup>-/-</sup>-HeLa* cells transiently transfected with ATG16L1 mutants for 42 h and then cells were treated with 10  $\mu$ M of niclosamide (Nic) and AMDE-1 for 6 h.

(D) *ATG16L1<sup>-/-</sup>-HeLa* cells were transiently transfected with mcherry-ATG16L1 or mcherry-ATG16L1 $\Delta$ WDR for 46 h and then treated with 1  $\mu$ M of torin1, 1  $\mu$ M of Rap (rapamycin), EBSS for 6 h. ATG16L1 and LC3 were analyzed by immunoblot.

(E) WT-HeLa cells and *ATG16L1<sup>-/-</sup>-HeLa* cells stably expressing GFP-ATG16L1,

GFP-ATG16L1<sup>ΔWD2</sup>, and GFP-ATG16L1<sup>ΔWDR</sup> were treated with EBSS, 1 μM of rapamycin (Rap), 1 μM of torin1, or 40 μM of chloroquine (CQ) for 6 h. ATG16L1 and LC3 were analyzed by immunoblot.

**A**

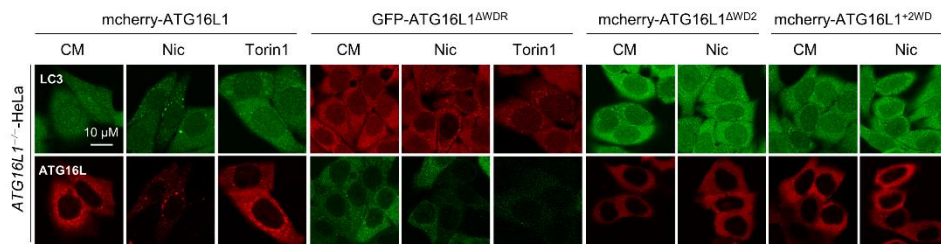

**Figure S3. ATG16L1 with incomplete WDR could not mediate the formation of LC3 puncta in canonical autophagy.**

(A) Confocal images of mcherry-ATG16L1 mutants and LC3 in *ATG16L1*<sup>-/-</sup>-HeLa cells transiently transfected ATG16L1 mutants for 42 h and then treated with 10 μM of Nic (niclosamide) or 1 μM of torin1 for 6 h. Cells were stained for LC3, scale bar=10 μm.

**Table S1.** Vectors and primers information of ATG16L1 plasmid.

| Gene                    | vector        | forward primer (a) (5'-3')     | primer b (5'-3')                 | primer c (5'-3')             | reverse primer (d) (5'-3') |
|-------------------------|---------------|--------------------------------|----------------------------------|------------------------------|----------------------------|
| ATG16L1                 | plvx-acGFP-N1 | ATGTCGTCGGGCCTCCGCGCCGCTGAC    | /                                | /                            | GTACTGTGCCCACAGCACAGC      |
| ATG16L1 <sup>ΔWDR</sup> | plvx-acGFP-N1 | ATGTCGTCGGGCCTCCGCGCCGCTGAC    | /                                | /                            | ATCGAAGACACACAAGGCAGTAGC   |
| ATG16L1                 | pmCherry-C1   | ATGTCGTCGGGCCTCCGCGCCGCTGACTTC | /                                | /                            | TCAGTACTGTGCCCACAGCACAGC   |
| ATG16L1 <sup>ΔWD1</sup> | pmCherry-C1   | ATGTCGTCGGGCCTCCGCGCCGCTGACTTC | TAGGGAACCGACACACAAGGCAGTAGC      | TTGTGTGTCGGTTCCCT ATCTGGCAG  | TCAGTACTGTGCCCACAGCACAGC   |
| ATG16L1 <sup>ΔWD2</sup> | pmCherry-C1   | ATGTCGTCGGGCCTCCGCGCCGCTGACTTC | TCCCGTGAGCTTGAACCTCACATTTTCTC    | GAGTTCA AGCTCACG GGACACAGTG  | TCAGTACTGTGCCCACAGCACAGC   |
| ATG16L1 <sup>ΔWD3</sup> | pmCherry-C1   | ATGTCGTCGGGCCTCCGCGCCGCTGACTTC | TGCAAACACTGTGTGCCGTAATCGATAATC   | CGGCA CACAGTGTTTGACAGGATCCAG | TCAGTACTGTGCCCACAGCACAGC   |
| ATG16L1 <sup>ΔWD4</sup> | pmCherry-C1   | ATGTCGTCGGGCCTCCGCGCCGCTGACTTC | CAGCTCCATTGTCTTTATGCAGACTTTGC    | ATAAAGACAATG GAGCTGTTGGGAAAG | TCAGTACTGTGCCCACAGCACAGC   |
| ATG16L1 <sup>ΔWD5</sup> | pmCherry-C1   | ATGTCGTCGGGCCTCCGCGCCGCTGACTTC | TGCACTGAACTCTCGAACTATGCTCTC      | GT TCGAGAGTTCAGTGCACCTGGGTTC | TCAGTACTGTGCCCACAGCACAGC   |
| ATG16L1 <sup>ΔWD6</sup> | pmCherry-C1   | ATGTCGTCGGGCCTCCGCGCCGCTGACTTC | GTGCTGCTTTGTCTGCTTGATAGC         | CAAGCAGACAAAGCAG CACAGCTCATC | TCAGTACTGTGCCCACAGCACAGC   |
| ATG16L1 <sup>ΔWD7</sup> | pmCherry-C1   | ATGTCGTCGGGCCTCCGCGCCGCTGACTTC | /                                | /                            | TCAGTACTGTGCCCACAGCACAGC   |
| ATG16L1 <sup>+2WD</sup> | pmCherry-C1   | ATGTCGTCGGGCCTCCGCGCCGCTGACTTC | CACITTTACTTTGTACTGTGCCACAGCACAGC | GCACAGTACAAAGTAAAGTTCCTG     | TCAGAACATCTTGACGTTGTTTC    |
